# Supplementary material
Source: PubMed Central journal article supplement (PMC4582408)

## SUPPLEMENTAL INFORMATION

**Supplementary Table 1**

Multicopy suppressors of *AAC2*<sup>A128P</sup>-induced degenerative cell death

| <b>Functional group</b>                        | <b>Gene</b>    | <b>Function of gene product</b>                                                                                                                                     |
|------------------------------------------------|----------------|---------------------------------------------------------------------------------------------------------------------------------------------------------------------|
| <b>Tor signaling</b>                           | <i>DOT6</i>    | Protein involved in rRNA and ribosome biogenesis under the control of the Tor1 kinase; subunit of the RPD3L histone deacetylase complex; paralog of Tod6            |
|                                                | <i>FHL1</i>    | Regulator of ribosomal protein transcription                                                                                                                        |
|                                                | <i>RPD3</i>    | Histone deacetylase                                                                                                                                                 |
|                                                | <i>TOD6</i>    | Protein involved in rRNA and ribosome biogenesis; subunit of the RPD3L histone deacetylase complex; paralog of Dot6                                                 |
| <b>mRNA turnover /silencing</b>                | <i>CDC33</i>   | mRNA cap binding protein and translation initiation factor eIF4E; component of cytoplasmic stress granules                                                          |
|                                                | <i>DCP2</i>    | Catalytic subunit of the Dcp1p-Dcp2p decapping enzyme complex; component of cytoplasmic mRNA processing body (P-body)                                               |
|                                                | <i>EDC3</i>    | Enhancer of mRNA decapping; component of cytoplasmic mRNA processing body (P-body)                                                                                  |
|                                                | <i>NAM7</i>    | ATP-dependent RNA helicase of the SFI superfamily involved in nonsense mediated mRNA decay                                                                          |
|                                                | <i>PBP1</i>    | Involved in P-body-dependent granule assembly; ortholog of human ataxin-2                                                                                           |
|                                                | <i>PRT1</i>    | eIF3b subunit of the core complex of translation initiation factor 3 (eIF3); component of cytoplasmic stress granules                                               |
|                                                | <i>PSP2</i>    | Asn rich cytoplasmic protein that contains the RNA-binding RGG motifs; component of P-bodies                                                                        |
|                                                | <i>TIF3</i>    | Translation initiation factor eIF-4B; constituent of stress granules                                                                                                |
|                                                | <i>TIF4632</i> | Translation initiation factor eIF4G; subunit of the mRNA cap-binding protein complex (eIF4F) that also contains eIF4E (Cdc33p); involved in stress granule assembly |
| <b>Ribosomal function /protein translation</b> | <i>REB1</i>    | RNA polymerase I enhancer binding protein                                                                                                                           |
|                                                | <i>RPL38</i>   | Ribosomal 60S subunit protein L38                                                                                                                                   |
|                                                | <i>RPL40A</i>  | Ubiquitin-ribosomal 60S subunit protein L40A fusion protein; cleaved to yield ubiquitin and ribosomal protein L40A                                                  |
|                                                | <i>RPL40B</i>  | Ubiquitin-ribosomal 60S subunit protein L40B fusion protein; cleaved to yield ubiquitin and ribosomal protein L40B                                                  |
|                                                | <i>RPL43A</i>  | Ribosomal 60S subunit protein L43A                                                                                                                                  |
|                                                | <i>RPP0</i>    | Conserved ribosomal protein P0 of the ribosomal stalk                                                                                                               |

|                                                   |               |                                                                                                                                                                                    |
|---------------------------------------------------|---------------|------------------------------------------------------------------------------------------------------------------------------------------------------------------------------------|
|                                                   | <i>RPS6B</i>  | Ribosomal 40S subunit protein S6B                                                                                                                                                  |
|                                                   | <i>RPS30B</i> | Ribosomal 40S subunit protein S30B                                                                                                                                                 |
|                                                   | <i>SNR3</i>   | H/ACA box small nucleolar RNA (snoRNA)                                                                                                                                             |
| <b>tRNA methylation</b>                           | <i>TRM9</i>   | tRNA methyltransferase; catalyzes modification of wobble bases in tRNA anticodons to 2, 5-methoxycarbonylmethyluridine and 5-methoxycarbonylmethyl-2-thiouridine                   |
|                                                   | <i>TRM11</i>  | Catalytic subunit of an adoMet-dependent tRNA methyltransferase complex (Trm11p-Trm112p), required for the methylation of the guanosine nucleotide at position 10 (m2G10) in tRNAs |
| <b>Cytosolic protein chaperoning /degradation</b> | <i>MMS2</i>   | Ubiquitin-conjugating enzyme variant                                                                                                                                               |
|                                                   | <i>POC4</i>   | Component of a heterodimeric Poc4p-Irc25p chaperone involved in assembly of alpha subunits into the 20S proteasome                                                                 |
|                                                   | <i>SAF1</i>   | F-Box protein involved in proteasome-dependent protein degradation                                                                                                                 |
|                                                   | <i>SSB1</i>   | Cytoplasmic ATPase that is a ribosome-associated molecular chaperone; functions with J-protein partner Zuo1p                                                                       |
|                                                   | <i>SSB2</i>   | Cytoplasmic ATPase that is a ribosome-associated molecular chaperone; functions with J-protein partner Zuo1p                                                                       |
|                                                   | <i>UBP3</i>   | Ubiquitin-specific protease                                                                                                                                                        |
|                                                   | <i>UMP1</i>   | Short-lived chaperone required for correct maturation of the 20S proteasome                                                                                                        |
|                                                   | <i>ZUO1</i>   | Ribosome-associated chaperone; contains a DnaJ domain and functions as a J-protein partner for Ssb1p and Ssb2p                                                                     |
| <b>Ungrouped</b>                                  | <i>HRR25</i>  | Protein kinase involved in diverse functions such as ribosomal biogenesis and tRNA modification                                                                                    |
|                                                   | <i>KIN2</i>   | Serine/threonine protein kinase                                                                                                                                                    |
|                                                   | <i>RG11</i>   | YER067W, protein of unknown function; possibly involved in energy metabolism under respiratory conditions                                                                          |
|                                                   | <i>SDD1</i>   | YEL057C, protein of unknown function                                                                                                                                               |
|                                                   | <i>SDD2</i>   | YMR074C, protein with homology to human PDCD5 involved in programmed cell death                                                                                                    |
|                                                   | <i>SDD3</i>   | YOL098C, putative metalloprotease                                                                                                                                                  |
|                                                   | <i>SDD4</i>   | YPR022C, putative transcription factor                                                                                                                                             |
|                                                   | <i>SSY5</i>   | Serine protease of SPS plasma membrane amino acid sensor system                                                                                                                    |

## Supplementary Table 2

Comparison of cytosolic proteomes between *AAC2<sup>A128P</sup>* and wild type cells as revealed by iTRAQ analysis

(The data are shown in a separate Source Data file)

Cytosolic protein samples from two biological replicates of wild type cells were labeled with the 114- and 115-tags and two biological replicates of *AAC2<sup>A128P</sup>*-expressing cells were labeled with the 116- and 117-tags. The ratios of particular proteins between the mutant and the wild type were calculated by using the 114 and 115 signals as denominators. The final mutant/WT ratio was the average of the 116/114, 117/114, 116/115 and 117/115 ratios.

### Supplementary Table 3

Gene Ontology Analysis Showing Cytosolic Processes that are Down-regulated by >2 in Response to Mitochondrial Inner Membrane Damage

| Gene Ontology Term                                                                              | Cluster Frequency          | P value  |
|-------------------------------------------------------------------------------------------------|----------------------------|----------|
| Oxidoreductase activity                                                                         | 30 out of 107 genes, 28.0% | 3.20e-16 |
| Oxidoreductase activity, acting on the CH-OH group of donors, NAD or NADP as acceptor           | 10 out of 107 genes, 9.3%  | 6.79e-06 |
| Oxidoreductase activity, acting on NAD(P)H                                                      | 7 out of 107 genes, 6.5%   | 1.08e-05 |
| Oxidoreductase activity, acting on CH-OH group of donors                                        | 10 out of 107 genes, 9.3%  | 1.92e-05 |
| Oxidoreductase activity, acting on the aldehyde or oxo group of donors                          | 6 out of 107 genes, 5.6%   | 0.00015  |
| Transferase activity, transferring hexosyl groups                                               | 9 out of 107 genes, 8.4%   | 0.00016  |
| Oxidoreductase activity, acting on a sulfur group of donors                                     | 6 out of 107 genes, 5.6%   | 0.00046  |
| Oxidoreductase activity, acting on the aldehyde or oxo group of donors, NAD or NADP as acceptor | 5 out of 107 genes, 4.7%   | 0.00076  |
| Transferase activity, transferring glycosyl groups                                              | 9 out of 107 genes, 8.4%   | 0.00101  |
| Transferase activity, transferring alkyl or aryl (other than methyl) groups                     | 6 out of 107 genes, 5.6%   | 0.00184  |
| UDP-glucosyltransferase activity                                                                | 4 out of 107 genes, 3.7%   | 0.00264  |
| Alditol:NADP+ 1-oxidoreductase activity                                                         | 3 out of 107 genes, 2.8%   | 0.00276  |
| Aldehyde dehydrogenase (NAD) activity                                                           | 3 out of 107 genes, 2.8%   | 0.00546  |
| Disulfide oxidoreductase activity                                                               | 4 out of 107 genes, 3.7%   | 0.00649  |
| Glucosyltransferase activity                                                                    | 3 out of 107 genes, 2.8%   | 0.00945  |
| Glutathione transferase activity                                                                | 3 out of 107 genes, 2.8%   | 0.00945  |
| Alcohol dehydrogenase (NADP+) activity                                                          | 3 out of 107 genes, 2.8%   | 0.00945  |

### Supplementary Table 4

Proteins that are up-regulated for >2 fold in the cytosol of AAC2<sup>A128P</sup>-expressing cells

| Category     | Protein | Function                                                                                               | Remarks |
|--------------|---------|--------------------------------------------------------------------------------------------------------|---------|
| Mitochondria | Idh2    | Subunit of mitochondrial NAD(+)-dependent isocitrate dehydrogenase                                     |         |
|              | Idh1    | Subunit of mitochondrial NAD(+)-dependent isocitrate dehydrogenase                                     |         |
|              | Mss116  | DEAD-box protein required for efficient splicing of mitochondrial Group I and II introns               |         |
|              | Hsp10   | Mitochondrial matrix co-chaperonin that inhibits the ATPase activity of Hsp60p                         |         |
|              | Ssc1    | Hsp70 family ATPase in mitochondria                                                                    |         |
|              | Mnp1    | Putative mitochondrial ribosomal protein                                                               |         |
|              | Hsp60   | Mitochondrial chaperonin                                                                               |         |
|              | Cpr3    | Mitochondrial peptidyl-prolyl cis-trans isomerase (cyclophilin)                                        |         |
|              | Shm1    | Mitochondrial serine hydroxymethyltransferase                                                          |         |
|              | Tuf1    | Mitochondrial translation elongation factor Tu                                                         |         |
|              | Aco1    | Mitochondrial aconitase                                                                                |         |
|              | Mmf1    | Mitochondrial protein required for transamination of isoleucine                                        |         |
|              | Leu4    | Alpha-isopropylmalate synthase (2-isopropylmalate synthase) localized to both mitochondria and cytosol |         |
|              | Arg7    | Mitochondrial ornithine acetyltransferase, catalyzes arginine biosynthesis                             |         |
|              | Cox17   | Copper metallochaperone in mitochondria                                                                |         |
|              | Idp1    | Mitochondrial NADP-specific isocitrate dehydrogenase                                                   |         |
|              | Pdb1    | E1 beta subunit of the pyruvate dehydrogenase (PDH) complex in mitochondria                            |         |
|              | Pda1    | E1 alpha subunit of the pyruvate dehydrogenase (PDH) complex in mitochondria                           |         |

|                                               |         |                                                                                                                                                                |                                                                      |
|-----------------------------------------------|---------|----------------------------------------------------------------------------------------------------------------------------------------------------------------|----------------------------------------------------------------------|
|                                               | Bat1    | Mitochondrial branched-chain amino acid (BCAA) aminotransferase                                                                                                |                                                                      |
|                                               | Ilv5    | Bifunctional acetoacetyl-CoA reductoisomerase and mtDNA binding protein in mitochondria                                                                        |                                                                      |
|                                               | Pim1    | ATP-dependent Lon protease in mitochondria                                                                                                                     |                                                                      |
|                                               | Kgd1    | Subunit of the mitochondrial alpha-ketoglutarate dehydrogenase complex                                                                                         |                                                                      |
|                                               | Nfu1    | Protein involved in iron metabolism in mitochondria                                                                                                            |                                                                      |
|                                               | Aac2    | Major ADP/ATP carrier of the mitochondrial inner membrane                                                                                                      | Mitochondrial inner membrane protein                                 |
| <b>Cytosolic ribosome associated proteins</b> | Tma7    | Protein of unknown that associates with ribosomes                                                                                                              | A highly conserved ribosome associated protein                       |
|                                               | Gis2    | Translational activator for mRNAs with internal ribosome entry sites                                                                                           | Ortholog of human ZNF9/CNBP involved in type 2 myotonic dystrophy    |
|                                               | Nog2    | GTPase required for the nuclear export of pre-60S ribosomal subunit                                                                                            | Ortholog of human nucleostemins                                      |
| <b>Methylation</b>                            | Sam1    | <i>S</i> -adenosylmethionine synthetase                                                                                                                        |                                                                      |
|                                               | Sam2    | <i>S</i> -adenosylmethionine synthetase                                                                                                                        |                                                                      |
| <b>Others</b>                                 | His3    | Histidine biosynthesis                                                                                                                                         |                                                                      |
|                                               | Guk1    | Guanylate kinase, converts GMP to GDP                                                                                                                          |                                                                      |
|                                               | YPR172W | Protein of unknown function, transcriptionally activated by Yrm1p along with genes involved in multidrug resistance                                            |                                                                      |
|                                               | Gyl1    | Putative GTPase activating protein (GAP)                                                                                                                       |                                                                      |
|                                               | Pno1    | Also known as Rrp20, involved in pre-18S rRNA processing by recruiting the 18S rRNA dimethyltransferase Dim1p                                                  | A point mutation is known to cause $\rho^0$ -lethality <sup>35</sup> |
|                                               | Bni1    | Formin, nucleates the formation of linear actin filaments                                                                                                      |                                                                      |
|                                               | Hem13   | Coproporphyrinogen III oxidase involved in heme biosynthetic pathway                                                                                           |                                                                      |
|                                               | YMR102C | Protein of unknown function; transcriptionally activated by paralogous transcription factors Yrm1p and Yrr1p along with genes involved in multidrug resistance |                                                                      |

|  |           |                                                                                          |  |
|--|-----------|------------------------------------------------------------------------------------------|--|
|  | Cup1-2    | Metallothionein                                                                          |  |
|  | Tub3      | Alpha-tubulin                                                                            |  |
|  | Pdr5      | Multidrug transporter on the plasma membrane                                             |  |
|  | YCR087C-A | Putative protein of unknown function                                                     |  |
|  | YGL039W   | Aldehyde reductase                                                                       |  |
|  | Gpm3      | Phosphoglycerate mutase, converts 3-phosphoglycerate to 2-phosphoglycerate in glycolysis |  |

### Supplementary Table 5

Anti-degenerative suppressors/pathways and their mammalian orthologs known to cause degenerative diseases

| Yeast               | Mammal       | Diseases and References                                                                                                                                                           |
|---------------------|--------------|-----------------------------------------------------------------------------------------------------------------------------------------------------------------------------------|
| Pbp1                | Ataxin-2     | Spinocerebellar ataxia type 2 and amyotrophic lateral sclerosis <sup>36-39</sup>                                                                                                  |
| Tif4631 and Tif4632 | eIF4G1       | Associated with Parkinson's disease in humans <sup>40</sup>                                                                                                                       |
| Nog2                | Nucleostemin | Osteoarthritis <sup>41</sup>                                                                                                                                                      |
| Hrr25               | TTBK2        | Spinocerebellar ataxia type 11 <sup>42</sup>                                                                                                                                      |
| Rpl38               | Rpl38        | Conductive hearing impairment in mouse <sup>43</sup>                                                                                                                              |
| Nam7/Upf1           | UPF3         | Upf3 forms complex with Upf2 and Upf1 which is identified as an anti-degenerative protein in yeast. Mutations in Upf3 cause X-linked mental retardation in humans <sup>44</sup> . |
| Gis2                | ZNF9/CNBP    | Myotonic dystrophy type 2 <sup>45</sup>                                                                                                                                           |
| Sam1, Sam2          | MAT1A        | Mental retardation, dystonia, demyelination and other neurological disorders <sup>46</sup>                                                                                        |



## References:

35. Senapin, S., Clark-Walker, G.D., Chen, X.J., Seraphin, B. & Daugeron, M.C. RRP20, a component of the 90S preribosome, is required for pre-18S rRNA processing in *Saccharomyces cerevisiae*. *Nucleic Acids Res* **31**, 2524-2533 (2003).
36. Pulst, S.M. *et al.* Moderate expansion of a normally biallelic trinucleotide repeat in spinocerebellar ataxia type 2. *Nat Genet* **14**, 269-276 (1996).
37. Imbert, G. *et al.* Cloning of the gene for spinocerebellar ataxia 2 reveals a locus with high sensitivity to expanded CAG/glutamine repeats. *Nat Genet* **14**, 285-291 (1996).
38. Sanpei, K. *et al.* Identification of the spinocerebellar ataxia type 2 gene using a direct identification of repeat expansion and cloning technique, DIRECT. *Nat Genet* **14**, 277-284 (1996).
39. Elden, A.C. *et al.* Ataxin-2 intermediate-length polyglutamine expansions are associated with increased risk for ALS. *Nature* **466**, 1069-1075 (2010).
40. Chartier-Harlin, M.C. *et al.* Translation initiator EIF4G1 mutations in familial Parkinson disease. *Am J Hum Genet* **89**, 398-406 (2011).
41. Zeggini, E. *et al.* Identification of new susceptibility loci for osteoarthritis (arcOGEN): a genome-wide association study. *Lancet* **380**, 815-823 (2012).
42. Houlden, H. *et al.* Mutations in *TTBK2*, encoding a kinase implicated in tau phosphorylation, segregate with spinocerebellar ataxia type 11. *Nat Genet* **39**, 1434-1436 (2007).
43. Noben-Trauth, K. & Latoche, J.R. Ectopic mineralization in the middle ear and chronic otitis media with effusion caused by RPL38 deficiency in the Tail-short (Ts) mouse. *J Biol Chem* **286**, 3079-3093 (2010).
44. Tarpey, P.S. *et al.* Mutations in UPF3B, a member of the nonsense-mediated mRNA decay complex, cause syndromic and nonsyndromic mental retardation. *Nat Genet* **39**, 1127-1133 (2007).
45. Sammons, M.A., Samir, P. & Link, A.J. *Saccharomyces cerevisiae* Gis2 interacts with the translation machinery and is orthogonal to myotonic dystrophy type 2 protein ZNF9. *Biochem Biophys Res Commun* **406**, 13-19 (2011).
46. Furujo, M., Kinoshita, M., Nagao, M. & Kubo, T. Methionine adenosyltransferase I/III deficiency: neurological manifestations and relevance of S-adenosylmethionine. *Mol Genet Metab* **107**, 253-256 (2012).

Full scans of Figure 3c

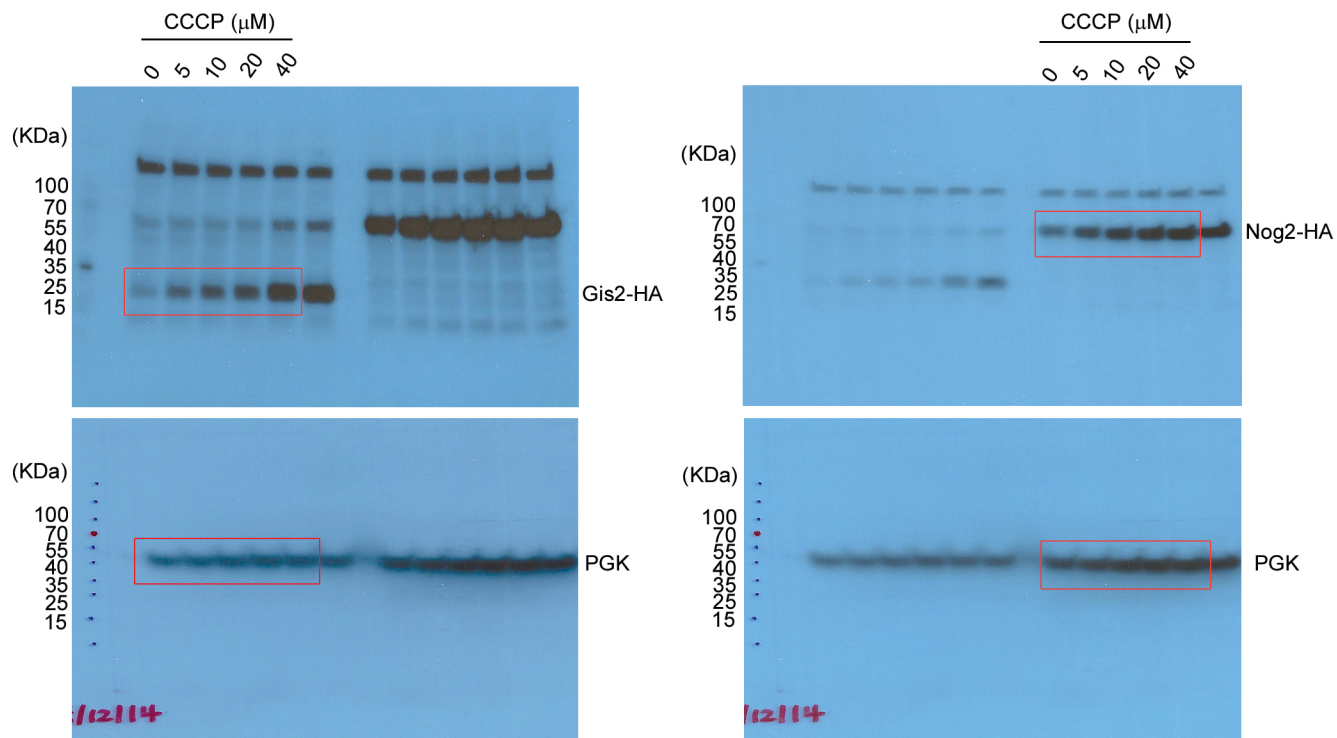

Full scans for Extended Data Figure 5a

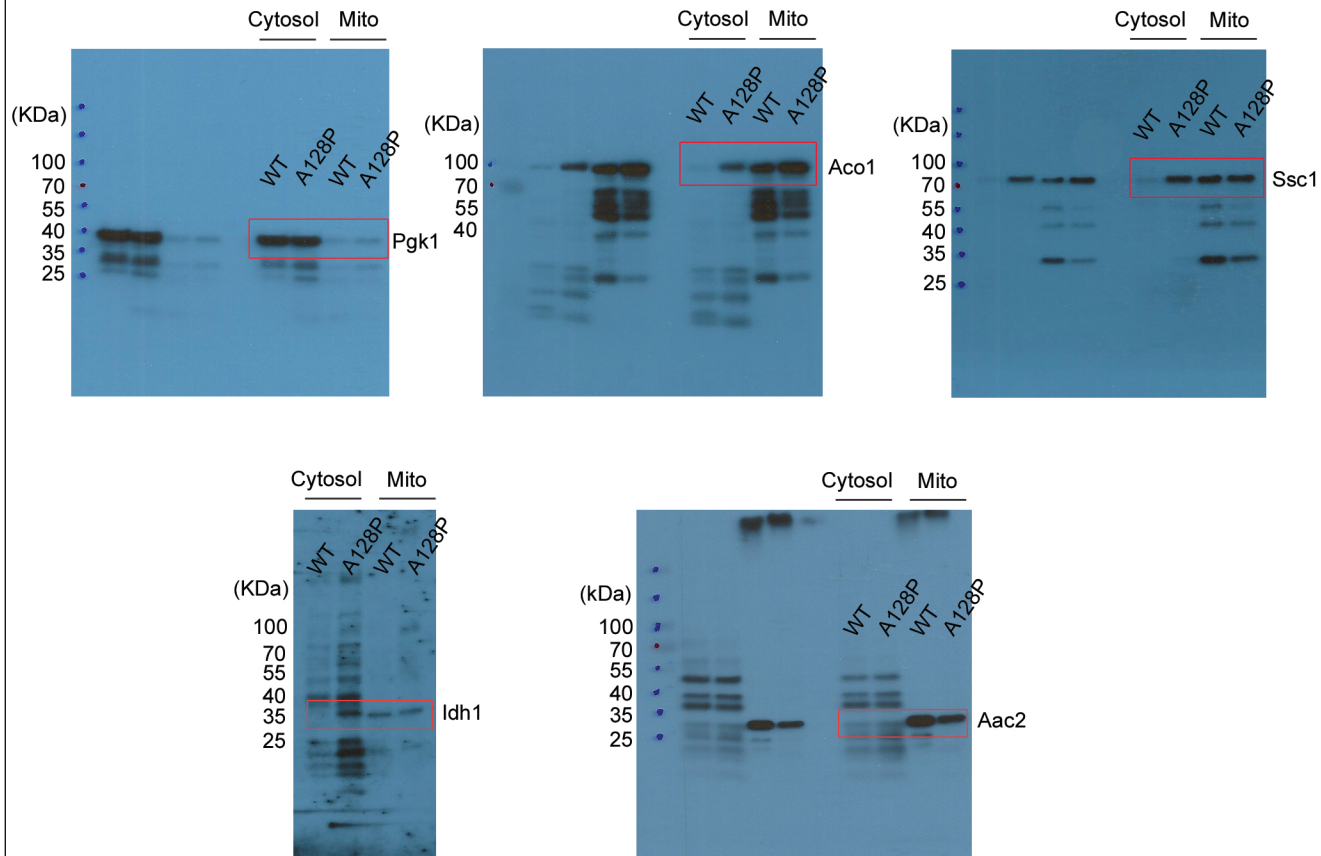

Full scans for Extended Data Figure 5b

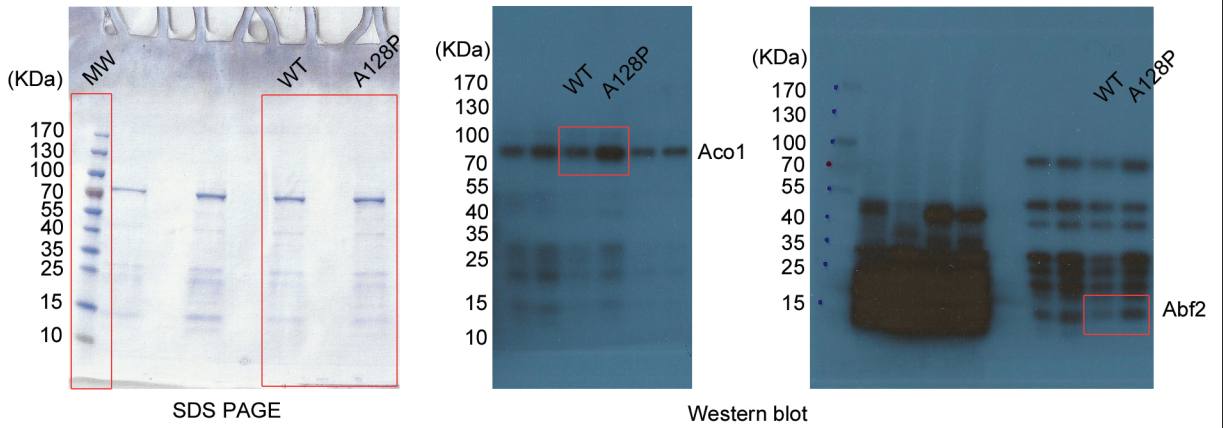

Full scans for Extended Data Figure 7

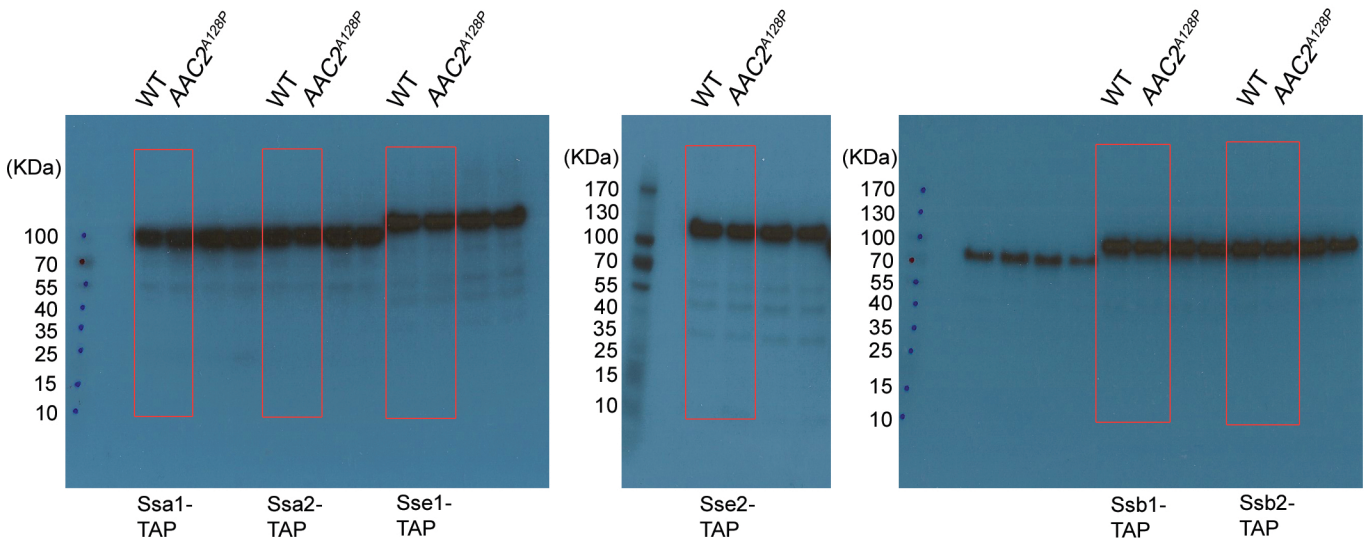

Supplement: NIHMS704157-supplement-1.pdf [file NIHMS704157-supplement-1.pdf]
